# Supplementary material for: Polymorphisms in the Calcium-Sensing Receptor Gene Are Associated with Clinical Outcome of Neuroblastoma
Source: PLoS One. 2013 Mar 22;8(3):e59762. doi: 10.1371/journal.pone.0059762 (PMC3606108; doi:10.1371/journal.pone.0059762)
Supplement: Table S2 — Clinical, histological and biological features of patients diagnosed with neuroblastic tumors and their genotype at three polymorphisms of the CaSR gene. The following data are provided for each patient in the cohort: clinical data at diagnosis (age in months and clinical stage according to the International Neuroblastoma Staging System), follow-up data required to calculate event-free and overall survival probabilities, histological subgroup, MYCN amplification status and genotype at three CaSR gene polymorphisms (rs1801725, rs1042636 and rs1801726). (XLSX) [file pone.0059762.s002.xlsx]

## Sheet: data
Table S2.
Clinical, histological and biological features of patients diagnosed with neuroblastic tumors.
and their genotype analysis at three coding exon 7 polymorphisms.
Patient	Age at diagnosis (months)	Clinical stage (INSS)	MYCN status	Pathology	Event (1=event, 0= no event)	Patient status (1=Dead, 0=Alive)	Follow-up months	Follow-up event months	rs1801725	rs1042636	rs1801726
1	120	4	0	Undifferentitated NB	1	1	93.8	52.7333	GT	AA	CC
2	24	4	0	Undifferentitated NB	1	1	9.06667	9.06667	GT	AA	CC
3	48	4	1	Undifferentitated NB	1	1	8.96667	8.96667	GT	AA	CG
4	24	4	1	Undifferentitated NB	1	1	7.23333	6.96667	GG	AA	CC
5	24	3	1	Undifferentitated NB	1	1	20.6	13.5	GT	AA	CC
6	2	4s	0	Undifferentitated NB	0	0	59.3333	59.3333	GT	AA	CC
7	24	3	1	Undifferentitated NB	1	0	51.2	17.2667	GG	AA	CC
8	19	3	1	Undifferentitated NB	0	0	93.1	93.1	GT	AA	CC
9	21	4	1	Undifferentitated NB	0	0	36	36	GG	AA	CC
10	0	1	0	Undifferentitated NB	0	0	36	36	GG	AA	CC
11	4	4	0	Undifferentitated NB	1	1	45.4333	11.6	GT	AA	CC
12	60	4	0	Undifferentitated NB	1	1	10.4	9.93333	GT	AA	CC
13	24	4	1	Undifferentitated NB	1	1	17.6	10.7	GG	AA	CC
14	24	4	0	Undifferentitated NB	0	0	27.8	27.3333	GG	AA	CC
15	48	4	0	Undifferentitated NB	1	0	27.9333	7.73333	GT	AA	CC
16	19	4	1	Undifferentitated NB	0	0	22.5667	22.1	GG	AA	CC
17	12	4	1	Undifferentitated NB	1	1	5.03333	5.03333	TT	AA	CC
18	36	4	1	Undifferentitated NB	1	1	24.8333	17.0333	GG	AA	CC
19	23	4	0	Undifferentitated NB	0	0	14.7	14.2333	GG	AG	CC
20	74	4	1	Undifferentitated NB	1	1	40.1333	12.2	GG	AA	CC
21	6	4	1	Undifferentitated NB	1	1	20.7333	20.7333	GG	AA	CC
22	24	4	0	Undifferentitated NB	0	0	24.8333	24.3667	GG	AA	CC
23	3	4	1	Undifferentitated NB	1	1	10.5333	10.5333	GT	AA	CC
24	84	3	0	Undifferentitated NB	1	1	25.8333	12.1333	GG	AA	CC
25	72	4	0	Poorly differentiated NB	1	1	25.7333	25.7333	GT	AA	CC
26	72	4	0	Poorly differentiated NB	1	0	82.6333	18.7	GT	AA	CC
27	12	1	0	Poorly differentiated NB	0	0	75.5667	75.5667	GG	AA	CC
28	15	3	0	Poorly differentiated NB	0	0	55.2333	55.2333	GG	AA	CC
29	22	1	1	Poorly differentiated NB	0	0	63.4	63.4	GG	AA	CC
30	12	3	0	Poorly differentiated NB	0	0	54.2333	54.2333	GT	AA	CC
31	72	4	0	Poorly differentiated NB	1	1	43.5333	16.2	GT	AG	CC
32	0	4s	0	Poorly differentiated NB	0	0	101.9	101.9	GT	AA	CC
33	12	4	0	Poorly differentiated NB	0	0	39.9667	39.9667	GT	AA	CC
34	8	3	0	Poorly differentiated NB	0	0	101.9	101.9	GG	GG	CC
35	12	1	0	Poorly differentiated NB	0	0	82.6333	82.6333	GG	AA	CC
36	1	3	0	Poorly differentiated NB	0	0	81.6	81.6	GG	AG	CC
37	6	3	0	Poorly differentiated NB	0	0	46.1	46.1	GG	AA	CC
38	39	4	0	Poorly differentiated NB	1	1	13.9667	13.9667	GG	AA	CC
39	0	4s	0	Poorly differentiated NB	0	0	43.7667	43.7667	GG	AA	CC
40	5	1	0	Poorly differentiated NB	0	0	36	36	GG	AA	CC
41	5	4s	0	Poorly differentiated NB	0	0	26.8667	26.8667	GG	AA	CC
42	49	3	0	Poorly differentiated NB	1	0	26.8667	26.8667	GG	AA	CC
43	15	4	0	Poorly differentiated NB	0	0	14.7	14.7	TT	AA	CC
44	120	4	0	Poorly differentiated NB	1	1	21.3333	17.6667	TT	AA	CC
45	22	4	0	Poorly differentiated NB	1	1	20.0667	8.2	GG	AG	CC
46	4	4s	0	Differentiating NB	0	0	83.6667	83.6667	GG	AA	CC
47	6	4s	0	Differentiating NB	0	0	60.3333	60.3333	GG	AA	CC
48	216	3	0	Differentiating NB	1	0	59.3333	34.9333	GG	AA	CC
49	48	4	0	Differentiating NB	0	0	36	36	GT	AG	CC
50	26	4	0	Differentiating NB	0	0	15.1333	14.6667	GG	AA	CC
51	60	4	0	Differentiating NB	0	0	49.1667	48.7	GT	AG	CG
52	2	4s	0	Differentiating NB	0	0	17.0333	16.5667	GG	AA	CG
53	12	3	0	Differentiating NB	0	0	12.2	11.7333	GG	AA	CC
54	18	3	0	Differentiating NB	0	0	15.6333	15.1667	GG	AA	CC
55	18	3	0	Ganglioneuroblastoma	0	0	74.5333	74.5333	GG	AA	CC
56	72	2	0	Ganglioneuroblastoma	0	0	52.1667	52.1667	GG	AG	CC
57	78	3	0	Ganglioneuroblastoma	0	0	39.0333	38.5667	GG	AA	CC
58	60	4	0	Ganglioneuroblastoma, nodular	1	1	42.3333	19.3333	GG	AA	CC
59	39	1	0	Ganglioneuroma	0	0	124.267	124.267	GG	AA	CC
60	96	1	0	Ganglioneuroma	0	0	115.1	115.1	GG	AA	CC
61	75	2	0	Ganglioneuroma	0	0	83.6667	83.6667	GG	AA	CC
62	24	1	0	Ganglioneuroma	0	0	63.4	63.4	GG	AA	CC
63	11	1	0	Ganglioneuroma	0	0	53.2	53.2	GG	AA	CG
64	48	1	0	Ganglioneuroma	0	0	31.1667	31.1667	GT	AA	CC
65	24	3	0	Ganglioneuroma	0	0	103.933	103.467	GG	AA	CC
NB: Neuroblastoma.
INSS: International Neuroblastoma Staging System.
MYCN status: 1: Amplified; 0: Not amplified.
